# Supplementary material
Source: MDPI journal article supplement (https://www.mdpi.com/2071-1050/15/8/6972)
Supplement: s1 [file s1]

**Table S1.** The soil physiochemical properties of the control and six soil treatments before and after growing the two crop species (carrot and lettuce) with irrigation of wastewater with 3 µg/L (IW3) and 30 µg/L (IW30) antibiotics (n=3).

| Treatment             | pH  | Conductivity<br>(mS/cm) | Water holding<br>capacity (%) | TOC<br>(%) | Available<br>Ca (mg/kg) | Available<br>Mg (mg/kg) | Available<br>Na (mg/kg) |
|-----------------------|-----|-------------------------|-------------------------------|------------|-------------------------|-------------------------|-------------------------|
| Before                |     |                         |                               |            |                         |                         |                         |
| Control               | 5.3 | 3.8                     | 56.0                          | 32.0       | 40.5                    | 27.3                    | 89.4                    |
| SL-BC(5%)             | 5.3 | 4.0                     | 62.0                          | 36.4       | 43.7                    | 30.1                    | 124.7                   |
| SL-BC(10%)            | 5.3 | 4.2                     | 59.0                          | 37.5       | 51.5                    | 44.9                    | 131.6                   |
| SL-BC(20%)            | 5.5 | 5.2                     | 58.0                          | 34.8       | 70.1                    | 47.7                    | 138.3                   |
| SL-CMHR-BC(5%)        | 5.6 | 5.3                     | 63.0                          | 33.6       | 55.1                    | 38.5                    | 119.9                   |
| SL-CMHR-BC(10%)       | 5.7 | 5.5                     | 59.0                          | 36.4       | 62.5                    | 49.8                    | 135.0                   |
| SL-CMHR-BC(20%)       | 5.8 | 6.6                     | 58.0                          | 38.4       | 84.3                    | 53.4                    | 144.0                   |
| After - Carrot (I3)   |     |                         |                               |            |                         |                         |                         |
| Control               | 4.6 | 0.4                     | 54.0                          | 33.8       | 16.5                    | 5.4                     | 56.5                    |
| SL-BC(5%)             | 4.8 | 1.2                     | 68.0                          | 35.6       | 25.5                    | 24.6                    | 86.5                    |
| SL-BC(10%)            | 4.7 | 1.4                     | 50.0                          | 35.5       | 36.4                    | 12.7                    | 66.5                    |
| SL-BC(20%)            | 4.6 | 1.4                     | 58.0                          | 40.2       | 20.7                    | 8.5                     | 86.5                    |
| SL-CMHR-BC(5%)        | 4.6 | 2.3                     | 62.0                          | 33.7       | 18.3                    | 16.5                    | 15.5                    |
| SL-CMHR-BC(10%)       | 4.5 | 2.4                     | 46.0                          | 36.0       | 36.5                    | 8.5                     | 26.5                    |
| SL-CMHR-BC(20%)       | 4.5 | 2.5                     | 52.0                          | 33.4       | 55.5                    | 6.4                     | 26.5                    |
| After - Lettuce (I3)  |     |                         |                               |            |                         |                         |                         |
| Control               | 4.8 | 1.3                     | 45.0                          | 35.5       | 33.6                    | 16.7                    | 29.0                    |
| SL-BC(5%)             | 5.0 | 3.3                     | 60.0                          | 39.0       | 22.7                    | 20.6                    | 35.7                    |
| SL-BC(10%)            | 4.9 | 3.5                     | 55.0                          | 38.9       | 22.5                    | 18.7                    | 45.2                    |
| SL-BC(20%)            | 4.9 | 2.3                     | 50.0                          | 38.6       | 36.4                    | 18.6                    | 39.5                    |
| SL-CMHR-BC(5%)        | 5.3 | 2.7                     | 65.0                          | 37.2       | 15.7                    | 17.6                    | 29.8                    |
| SL-CMHR-BC(10%)       | 5.1 | 3.1                     | 55.0                          | 39.4       | 24.6                    | 8.5                     | 36.5                    |
| SL-CMHR-BC(20%)       | 5.2 | 3.5                     | 55.0                          | 39.0       | 40.7                    | 3.7                     | 29.4                    |
| After - Carrot (I30)  |     |                         |                               |            |                         |                         |                         |
| Control               | 4.5 | 2.6                     | 64.0                          | 33.3       | 12.7                    | 5.7                     | 36.5                    |
| SL-BC(5%)             | 4.9 | 3.5                     | 58.0                          | 35.0       | 28.4                    | 3.6                     | 36.5                    |
| SL-BC(10%)            | 4.6 | 3.7                     | 52.0                          | 37.5       | 22.5                    | 5.5                     | 40.5                    |
| SL-BC(20%)            | 4.6 | 3.5                     | 54.0                          | 35.4       | 19.5                    | 4.7                     | 25.7                    |
| SL-CMHR-BC(5%)        | 4.6 | 3.4                     | 64.0                          | 34.8       | 36.5                    | 4.7                     | 18.6                    |
| SL-CMHR-BC(10%)       | 4.6 | 3.4                     | 62.0                          | 36.8       | 25.5                    | 10.7                    | 29.6                    |
| SL-CMHR-BC(20%)       | 4.5 | 3.8                     | 54.0                          | 34.4       | 15.7                    | 5.7                     | 34.0                    |
| After - Lettuce (I30) |     |                         |                               |            |                         |                         |                         |
| Control               | 4.9 | 2.6                     | 45.0                          | 37.5       | 33.6                    | 5.6                     | 36.4                    |
| SL-BC(5%)             | 4.7 | 3.5                     | 70.0                          | 37.9       | 22.7                    | 4.7                     | 29.9                    |
| SL-BC(10%)            | 4.6 | 3.4                     | 60.0                          | 39.3       | 28.0                    | 6.3                     | 27.7                    |
| SL-BC(20%)            | 4.7 | 3.5                     | 60.0                          | 40.9       | 19.7                    | 4.7                     | 18.5                    |
| SL-CMHR-BC(5%)        | 4.7 | 3.4                     | 75.0                          | 38.4       | 18.6                    | 8.9                     | 16.9                    |
| SL-CMHR-BC(10%)       | 4.8 | 3.4                     | 60.0                          | 38.6       | 14.7                    | 11.0                    | 29.5                    |
| SL-CMHR-BC(20%)       | 4.9 | 3.7                     | 55.0                          | 39.8       | 12.7                    | 4.7                     | 20.0                    |

**Table S1 (Continued)**

| <b>Treatment</b>             | <b>Total N<br/>(g/kg)</b> | <b>Total P<br/>(g/kg)</b> | <b>Total K<br/>(g/kg)</b> | <b>Available<br/>N (mg/kg)</b> | <b>Available<br/>P (mg/kg)</b> | <b>Available<br/>K (mg/kg)</b> |
|------------------------------|---------------------------|---------------------------|---------------------------|--------------------------------|--------------------------------|--------------------------------|
| <b>Before</b>                |                           |                           |                           |                                |                                |                                |
| Control                      | 124                       | 189                       | 150                       | 50.2                           | 74.9                           | 20.7                           |
| SL-BC(5%)                    | 135                       | 225                       | 327                       | 60.3                           | 84.5                           | 109.0                          |
| SL-BC(10%)                   | 159                       | 270                       | 462                       | 77.9                           | 91.2                           | 154.1                          |
| SL-BC(20%)                   | 180                       | 340                       | 409                       | 127.2                          | 94.8                           | 169.6                          |
| SL-CMHR-BC(5%)               | 142                       | 275                       | 302                       | 107.7                          | 93.3                           | 100.7                          |
| SL-CMHR-BC(10%)              | 163                       | 305                       | 481                       | 130.9                          | 129.2                          | 160.3                          |
| SL-CMHR-BC(20%)              | 292                       | 360                       | 525                       | 185.9                          | 213.2                          | 241.6                          |
| <b>After - Carrot (I3)</b>   |                           |                           |                           |                                |                                |                                |
| Control                      | 109                       | 110                       | 80                        | 15.3                           | 22.5                           | 4.6                            |
| SL-BC(5%)                    | 104                       | 102                       | 170                       | 37.8                           | 51.2                           | 25.9                           |
| SL-BC(10%)                   | 120                       | 105                       | 240                       | 22.2                           | 24.5                           | 9.6                            |
| SL-BC(20%)                   | 168                       | 95                        | 200                       | 73.8                           | 73.3                           | 39.4                           |
| SL-CMHR-BC(5%)               | 107                       | 151                       | 170                       | 58.9                           | 52.7                           | 32.8                           |
| SL-CMHR-BC(10%)              | 98                        | 170                       | 250                       | 49.6                           | 28.6                           | 89.6                           |
| SL-CMHR-BC(20%)              | 207                       | 201                       | 240                       | 41.3                           | 28.5                           | 67.6                           |
| <b>After - Lettuce (I3)</b>  |                           |                           |                           |                                |                                |                                |
| Control                      | 98                        | 94                        | 86                        | 25.3                           | 54.0                           | 11.6                           |
| SL-BC(5%)                    | 105                       | 144                       | 148                       | 42.5                           | 47.2                           | 60.6                           |
| SL-BC(10%)                   | 123                       | 205                       | 145                       | 55.9                           | 69.6                           | 81.4                           |
| SL-BC(20%)                   | 104                       | 251                       | 157                       | 82.6                           | 72.2                           | 97.7                           |
| SL-CMHR-BC(5%)               | 120                       | 233                       | 129                       | 57.7                           | 67.4                           | 64.9                           |
| SL-CMHR-BC(10%)              | 119                       | 253                       | 134                       | 69.3                           | 64.4                           | 74.9                           |
| SL-CMHR-BC(20%)              | 205                       | 308                       | 337                       | 86.2                           | 57.3                           | 53.5                           |
| <b>After - Carrot (I30)</b>  |                           |                           |                           |                                |                                |                                |
| Control                      | 107                       | 110                       | 110                       | 26.2                           | 12.2                           | 8.0                            |
| SL-BC(5%)                    | 113                       | 130                       | 160                       | 28.9                           | 41.7                           | 16.9                           |
| SL-BC(10%)                   | 99                        | 210                       | 170                       | 72.9                           | 59.1                           | 24.6                           |
| SL-BC(20%)                   | 118                       | 99                        | 170                       | 114.9                          | 74.0                           | 22.5                           |
| SL-CMHR-BC(5%)               | 124                       | 210                       | 240                       | 19.0                           | 22.6                           | 59.7                           |
| SL-CMHR-BC(10%)              | 126                       | 210                       | 240                       | 61.4                           | 38.9                           | 54.8                           |
| SL-CMHR-BC(20%)              | 206                       | 250                       | 380                       | 64.4                           | 99.1                           | 36.8                           |
| <b>After - Lettuce (I30)</b> |                           |                           |                           |                                |                                |                                |
| Control                      | 100                       | 113                       | 75                        | 16.5                           | 25.3                           | 8.2                            |
| SL-BC(5%)                    | 89                        | 163                       | 174                       | 45.6                           | 54.1                           | 72.2                           |
| SL-BC(10%)                   | 99                        | 137                       | 139                       | 38.2                           | 41.9                           | 55.7                           |
| SL-BC(20%)                   | 101                       | 233                       | 164                       | 73.1                           | 59.4                           | 81.2                           |
| SL-CMHR-BC(5%)               | 113                       | 215                       | 207                       | 53.1                           | 67.2                           | 15.3                           |
| SL-CMHR-BC(10%)              | 118                       | 263                       | 220                       | 74.4                           | 69.3                           | 67.0                           |
| SL-CMHR-BC(20%)              | 199                       | 283                       | 439                       | 68.5                           | 61.9                           | 88.3                           |

**Table S2** Initial nutrient content of soils amended with chicken manure and food waste compost and in different proportions.

| <b>Treatment</b>         | <b>Available<br/>N (mg/kg)</b> | <b>Available<br/>P (mg/kg)</b> | <b>Available<br/>K (mg/kg)</b> | <b>Total N<br/>(g/kg)</b> | <b>Total P<br/>(g/kg)</b> | <b>Total K<br/>(g/kg)</b> |
|--------------------------|--------------------------------|--------------------------------|--------------------------------|---------------------------|---------------------------|---------------------------|
| Chicken Manure (5%)      | 53.4                           | 78.4                           | 56.6                           | 100                       | 66.9                      | 201                       |
| Chicken Manure (10%)     | 58.4                           | 81.5                           | 70.5                           | 111                       | 70                        | 225                       |
| Chicken Manure (15%)     | 60.7                           | 86.3                           | 99.5                           | 128                       | 72.5                      | 233                       |
| Chicken Manure (20%)     | 61.4                           | 89.4                           | 130                            | 147                       | 76                        | 264                       |
| Food Waste Compost (5%)  | 51.2                           | 76.8                           | 45.1                           | 98.1                      | 65.2                      | 190                       |
| Food Waste Compost (10%) | 53.5                           | 79.6                           | 65.6                           | 112.1                     | 66.2                      | 211                       |
| Food Waste Compost (15%) | 56.8                           | 82.6                           | 98.5                           | 115                       | 70.8                      | 221                       |
| Food Waste Compost (20%) | 59.7                           | 85.4                           | 127.4                          | 128                       | 74.7                      | 235                       |

**Table S3** Effects of different proportions of BC-SL and BC-CMHR-SL on the germination of carrot and lettuce.

| <b>Crop species</b> | <b>Treatment</b> | <b>Germination rate (%)</b> | <b>Root length (mm)</b> | <b>Shoot length (mm)</b> |
|---------------------|------------------|-----------------------------|-------------------------|--------------------------|
| Carrot              | Control          | 96                          | 19.6±1.0                | 7.5±0.8                  |
|                     | SL-BC (5%)       | 84                          | 20.5±0.8                | 8.6±0.6                  |
|                     | SL-BC (10%)      | 85                          | 18.7±0.3                | 6.4±0.9                  |
|                     | SL-BC (20%)      | 86                          | 16.9±1.8                | 5.5±0.9                  |
|                     | SL-CMHR-BC (5%)  | 85                          | 20.6±1.1                | 9.1±1.2                  |
|                     | SL-CMHR-BC (10%) | 88                          | 17.8±0.6                | 6.5±0.8                  |
|                     | SL-CMHR-BC (20%) | 86                          | 16.6±0.3                | 5.3±0.6                  |
| Lettuce             | Control          | 92                          | 28.3±0.4                | 5.3±0.4                  |
|                     | SL-BC (5%)       | 89                          | 28.8±0.2                | 5.4±0.6                  |
|                     | SL-BC (10%)      | 89                          | 25.3±0.2                | 4.1±0.5                  |
|                     | SL-BC (20%)      | 88                          | 18.6±0.5                | 2.6±0.3                  |
|                     | SL-CMHR-BC (5%)  | 85                          | 28.7±1.9                | 6.0±0.4                  |
|                     | SL-CMHR-BC (10%) | 86                          | 26.4±1.1                | 5.4±0.6                  |
|                     | SL-CMHR-BC (20%) | 85                          | 19.1±0.9                | 2.8±0.9                  |
